# Supplementary material for: Crystal Structures and Binding Dynamics of Odorant-Binding Protein 3 from two aphid species Megoura viciae and Nasonovia ribisnigri
Source: PubMed Central journal article supplement (PMC4840437; doi:10.1038/srep24739), 2016-04-22

Crystal Structures and Binding Dynamics of Odorant-Binding Protein 3 from two aphid species *Megoura viciae* and *Nasonovia ribisnigri*

**Tom Northey<sup>¶1,2,5</sup>, Herbert Venthur<sup>¶1,4</sup>, Filomena De Biasio<sup>¶1,3</sup>, Francois-Xavier Chauviac<sup>2,6</sup>, Ambrose Cole<sup>2</sup>, Karlos Antonio Lisboa Ribeiro Junior<sup>1</sup>, Gerarda Grossi<sup>3</sup>, Patrizia Falabella<sup>3</sup>, Linda M. Field<sup>1</sup>, Nicholas H. Keep<sup>2</sup>, Jing-Jiang Zhou<sup>\*1</sup>**

**Supplementary Table 1. Data collection and refinement parameters for apo-MvicOBP3 and NribOBP3 structures.**

| Crystal                                   | <i>M. viciae</i>               | <i>N. ribisnigri</i>     |
|-------------------------------------------|--------------------------------|--------------------------|
| PDB CODE                                  | 4Z39                           | 4Z45                     |
| <b>Data collection</b>                    |                                |                          |
| Wavelength (Å)                            | 0.9686                         | 0.9173                   |
| Space group                               | P1 (1)                         | P3 <sub>1</sub> 21 (152) |
| Cell dimensions                           |                                |                          |
| <i>a</i> , <i>b</i> , <i>c</i> (Å)        | 36.2, 41.4, 44.3               | 87.3, 87.3, 95.1         |
| $\alpha$ , $\beta$ , $\gamma$ (°)         | 100.3, 101.7, 105.0            | 90, 90, 120              |
| Resolution (Å) <sup>a</sup>               | 38.8-1.30<br>(1.32-1.30)       | 59.6-2.02<br>(2.07-2.02) |
| Total number of reflections <sup>a</sup>  | 157442 (6151)                  | 558861 (41849)           |
| Number of unique reflections <sup>a</sup> | 52318 (2327)                   | 27946 (2051)             |
| R <sub>merge</sub> <sup>a</sup>           | 0.089 (0.398)                  | 0.149 (0.738)            |
| R <sub>meas</sub> <sup>a</sup>            | 0.125 (0.563)                  | 0.156 (0.776)            |
| R <sub>pim</sub> <sup>a</sup>             | 0.089 (0.398)                  | 0.035 (0.172)            |
| CC (1/2) <sup>a</sup>                     | 0.976 (0.716)                  | 0.998 (0.938)            |
| Solvent content (%)                       | 45.1                           | 51.9                     |
| Molecule/asymmetric unit                  | 2                              | 3                        |
| Wilson B-factor (Å <sup>2</sup> )         | 17.5                           | 8.8                      |
| I/ $\sigma$ I <sup>a</sup>                | 9.6 (1.9)                      | 16.3 (4.6)               |
| Completeness (%) <sup>a</sup>             | 90.1 (81.7)                    | 100 (100)                |
| Redundancy <sup>a</sup>                   | 3.0 (2.6)                      | 20.0 (20.4)              |
| <b>Refinement</b>                         |                                |                          |
| Resolution (Å) <sup>a</sup>               | 38.8-1.30<br>(1.33-1.30)       | 69.2-2.02<br>(2.07-2.02) |
| Reflection, working                       | 49450                          | 26520                    |
| Reflection, free                          | 3375                           | 1946                     |
| R <sub>work</sub> /R <sub>free</sub> (%)  | 12.5/16.1                      | 16.4/20.7                |
| No of non-H atoms                         | 2115                           | 3133                     |
| Protein                                   | A,969 B,977                    | A,940 B,943 D, 941       |
| Others                                    | 12 (Glycerol)<br>20 (Sulphate) |                          |

|                                          |                 |                      |
|------------------------------------------|-----------------|----------------------|
| Water                                    | 199             | 366                  |
| B factors (Å <sup>2</sup> ) <sup>b</sup> | 23.8            | 26.6                 |
| Protein                                  | A, 22.7 B, 23.6 | A,19.5 B,25.6 D,30.2 |
| Others                                   | 40.5 (Glycerol) |                      |
|                                          | 58.0 (Sulphate) |                      |
| Water                                    | 36.0            | 31.5                 |
| Rmsds                                    |                 |                      |
| Bond lengths (Å)                         | 0.034           | 0.026                |
| Bond angles (°)                          | 2.8             | 2.1                  |
| Ramachandran plot                        |                 |                      |
| Favoured (%)                             | 97.8            | 98.2                 |
| Allowed (%)                              | 1.8             | 1.8                  |
| Outliers (%)                             | 0.4             | 0                    |

<sup>a</sup> Values in parentheses are for the highest-resolution shell. <sup>b</sup> Average over all atoms.

$$R_{merge} = \frac{\sum_{hkl} \sum_j |I_{hkl,j} - \langle I_{hkl} \rangle|}{\sum_{hkl} \sum_j I_{hkl,j}}$$

$$R_{means} = \frac{\sum_{hkl} \sqrt{\frac{n}{n-1}} \sum_{j=1}^n |I_{hkl,j} - \langle I_{hkl} \rangle|}{\sum_{hkl} \sum_j I_{hkl,j}}$$

$$R_{p.i.m} = \frac{\sum_{hkl} \sqrt{\frac{1}{n-1}} \sum_{j=1}^n |I_{hkl,j} - \langle I_{hkl} \rangle|}{\sum_{hkl} \sum_j I_{hkl,j}}$$

where  $I_{hkl}$  is the reflection intensity and  $\langle I_{hkl} \rangle$  is the average intensity for multiple measurements of that reflection.

**Supplementary Table 2. Comparison of MvicOBP3 and NribOBP3 with other insect OBPs by DALI and PDBeFold search.**

**Top 4 distinct PDB entries and lowest 2 distinct PDB entries above first non-IPR00137 protein shown.**

| RANK<br>MvicOBP3<br>DALI     | Chain  | Z-score | RMSD | %id | nres | Form    | Macromolecule                              | Molecule in<br>Asymmetric<br>Unit (ASU) | Ligand Binding   | Stoichiometry   |
|------------------------------|--------|---------|------|-----|------|---------|--------------------------------------------|-----------------------------------------|------------------|-----------------|
| 1                            | 4F7F-D | 9.7     | 3.4  | 12  | 107  | complex | <i>A.gambiae</i> OBP20                     | 4                                       | ligand in pocket | A2              |
| 3                            | 3V2L-A | 9.4     | 3.6  | 13  | 107  | complex | <i>A.gambiae</i> OBP20                     |                                         |                  |                 |
| 6                            | 3VB1-A | 9.0     | 3.7  | 12  | 105  | apo     | <i>A.gambiae</i> OBP20                     |                                         |                  |                 |
| 7                            | 3R72-A | 8.9     | 3.4  | 13  | 99   | complex | <i>A.mellifera</i> OBP5                    | 1                                       |                  | monomer         |
|                              |        |         |      |     |      |         |                                            |                                         |                  |                 |
| 166                          | 1C3Z-A | 4.4     | 5.1  | 17  | 78   | complex | <i>T.Mollitor</i> 14.3k Haemolymph protein | 1                                       |                  | monomer         |
| 167                          | 2FJY-A | 4.4     | 3.8  | 11  | 92   | apo     | <i>B.mori</i> PBP (Cterm in core)          | 2                                       |                  | monomer         |
| RANK<br>NribOBP3<br>DALI     | Chain  | Z-score | RMSD | %id | nres | Form    | Macromolecule                              | Molecule in<br>Asymmetric<br>Unit (ASU) | Ligand Binding   | Stoichiometry   |
| 1                            | 4F7F-D | 9.2     | 3.2  | 14  | 103  | complex | <i>A.gambiae</i> OBP20                     | 4                                       | ligand in pocket | A2              |
| 2                            | 1ORG-B | 9.1     | 3.4  | 18  | 106  | complex | <i>Rhyarobia maderae</i> OBP               | 2                                       |                  | monomer         |
| 4                            | 3V2L-A | 9.1     | 3.4  | 14  | 103  | complex | <i>A.gambiae</i> OBP20                     |                                         |                  |                 |
| 6                            | 3R72-A | 8.9     | 3.4  | 15  | 101  | complex | <i>A.mellifera</i> OBP5                    | 1                                       |                  | monomer         |
|                              |        |         |      |     |      |         |                                            |                                         |                  |                 |
| 158                          | 3R1P-D | 5.0     | 3.8  | 20  | 80   | apo     | <i>A.gambiae</i> OBP7                      | 6                                       |                  | monomer         |
| 160                          | 3R1O-B | 4.8     | 4.3  | 19  | 83   | apo     | <i>A.gambiae</i> OBP7                      | 6                                       |                  | monomer         |
| RANK<br>MvicOBP3<br>PDBeFold | Chain  | Z-score | RMSD | %id | nres | Form    | Macromolecule                              | Molecule in<br>Asymmetric<br>Unit (ASU) | Ligand Binding   | Stoichiometry   |
| 1                            | 4PT1-B | 4.8     | 2.3  | 14  | 83   | complex | <i>L. migratoria</i> OPB1                  | 2                                       |                  | monomer         |
| 2                            | 3R72-A | 4.8     | 2.8  | 14  | 94   | complex | <i>A.mellifera</i> OBP5                    | 1                                       |                  | monomer         |
| 3                            | 3D78-A | 4.2     | 2.7  | 17  | 81   | complex | <i>A.mellifera</i> PBP1                    | 2                                       |                  | homo 2-mer - A2 |
| 4                            | 4F7F-D | 4.1     | 2.7  | 14  | 96   | complex | <i>A.gambiae</i> OBP20                     | 4                                       |                  | A2              |
|                              |        |         |      |     |      |         |                                            |                                         |                  |                 |
| 85                           | 3D75-A | 2.4     | 3.1  | 12  | 81   | complex | <i>A.mellifera</i> ASP1                    | 2                                       |                  | homo 2-mer - A2 |
| 86                           | 3R1P-A | 2.3     | 3.1  | 14  | 74   | apo     | <i>A.gambiae</i> OBP7                      | 6                                       |                  | monomer         |
| RANK<br>NribOBP3<br>PDBeFOLD | Chain  | Z-score | RMSD | %id | nres | Form    | Macromolecule                              | Molecule in<br>Asymmetric<br>Unit (ASU) | Ligand Binding   | Stoichiometry   |
| 1                            | 4PT1-B | 4.8     | 2.2  | 17  | 81   | complex | <i>L. migratoria</i> OPB1                  | 2                                       |                  | monomer         |
| 2                            | 3R72-A | 4.6     | 2.9  | 14  | 98   | complex | <i>A.mellifera</i> OBP5                    | 1                                       |                  | monomer         |
| 3                            | 3VB1-A | 4.5     | 2.7  | 13  | 89   | complex | <i>A.gambiae</i> OBP20                     | 4                                       |                  | monomer         |
| 4                            | 2H8V-A | 4.3     | 2.2  | 18  | 71   | complex | <i>A.mellifera</i> ASP1                    | 1                                       |                  | monomer         |
|                              |        |         |      |     |      |         |                                            |                                         |                  |                 |
| 70                           | 3B86-A | 2.6     | 3.1  | 16  | 101  | complex | <i>D. melanogaster</i> LUSH                | 2                                       |                  | monomer         |
| 71                           | 2L2C-A | 2.1     | 3.5  | 9   | 88   | apo     | <i>C. quinquefasciatus</i> OBP1 (NMR)      | 1                                       |                  | monomer         |

Matches to the same PDB have been omitted, but they are not always consecutive. Eg The 4 chains of 4F7F match MvicOBP3 in PDBeFold at ranks 4,13,19 and 20.

**Supplementary Figure 1.** OBP3 peptide sequence alignment between MvicOBP3, NribOBP3 and ApisOBP3. The residues that form the proposed binding site are highlighted in orange (MvicOBP3) and blue (NribOBP3), and Tyr30 is indicated by a red arrow.

```

MvicOBP3  RFTTEQIDYYGKACNASEDDLVVVKSYKVPSSETGKCLMKCMITKLGLLNDDGSYNKTGM
NribOBP3  RFTTEQIDYYGKACNASEDDLVVVKSYKVPSSETGKCLMKCMITKLGLLNDDGSYNKTGM
ApisOBP3  RFTTEQIDYYGKACNASEDDLVVVKSYKVPTTETGKCLMKCMITKLGLLNDDGSYNKTGM
*****:*****

MvicOBP3  EAGLKYWSEWSTEKIESINNKCYEEALLVSKEVIATCNYSYTVMACLNKQLDLDDKST
NribOBP3  EAGLKYWSEWSTEKIESINNKCYEEALLVSKEVVATCNYSYTVMACLNKQLDL---
ApisOBP3  EAGLKYWSEWSTEKIESINNKCYEEALLVSKEVVATCNYSYTVMACLNKQLDLDDKST
*****:*****:

```

**Supplementary Figure 2.** Expression and purification of MvicOBP3 and NribOBP3. Electrophoretic analysis (SDS-PAGE) of crude bacterial pellets before (UnIN) and after (IN) induction with IPTG for MvicOBP3 (lane 2 and 3) and for NribOBP3 (lane 4), and of purified samples (P) of the proteins. Molecular weights of markers (M) are from the top, 66, 45, 29, 20 and 14 kDa.

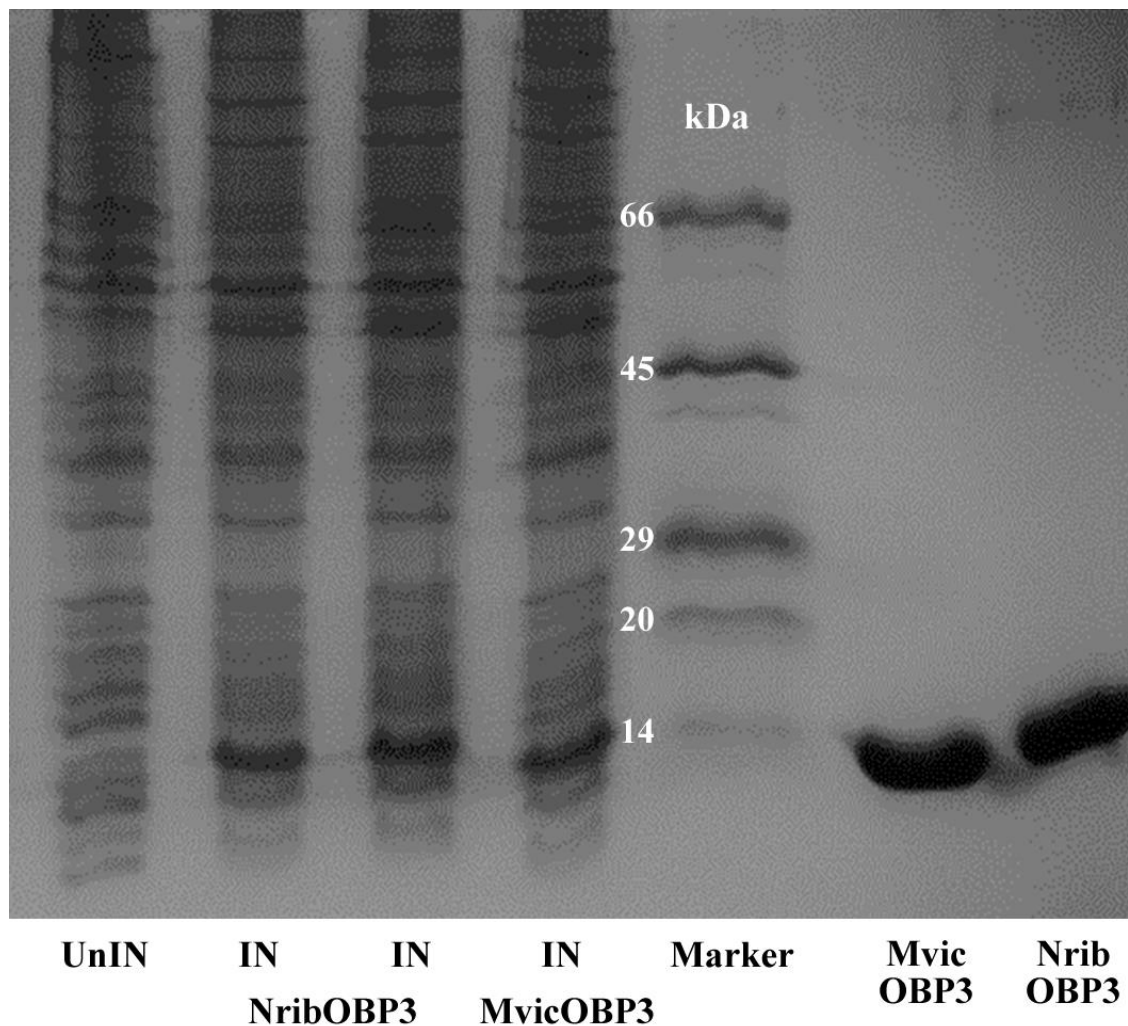

**Supplementary Figure 3.** Superimposed structures for MvicOBP3 (A) and NribOBP3 (B) before (green) and after (light blue) 10 nsec simulation of molecular dynamic analysis.

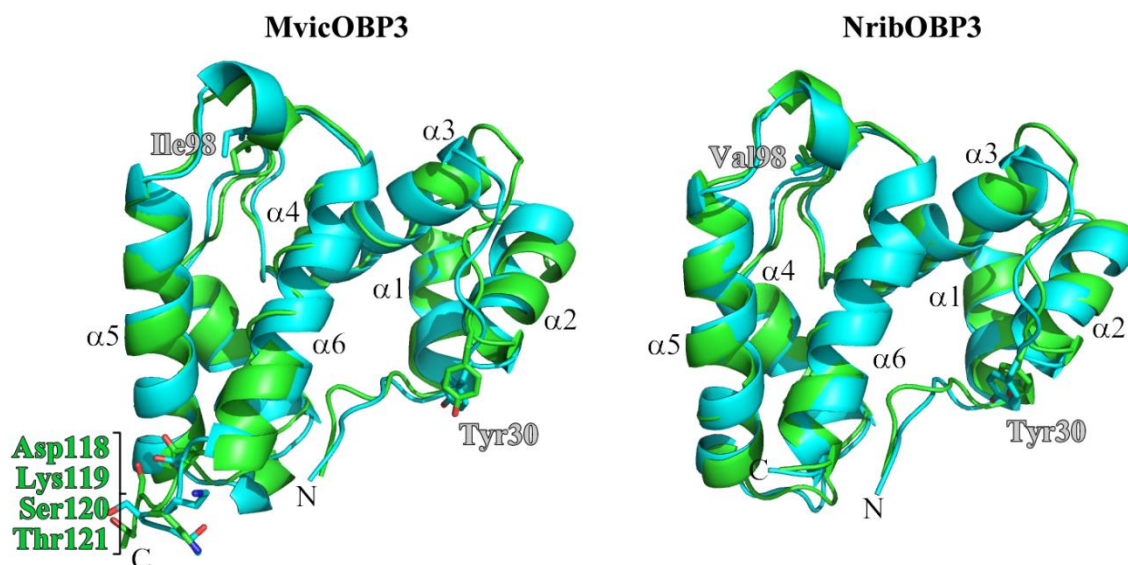

**Supplementary Figure 4.** A close look at the binding region of MvicOBP3 (top right box) and NribOBP3 (bottom right box) before (green for MvicOBP3 and magenta for NribOBP3) and after (light blue for MvicOBP3 and yellow for NribOBP3) 10 nsec simulation of molecular dynamic analysis. C and N indicate C- and N-terminals, respectively. Alphas 1 to 6 indicate the number and position of ribbons for all the 3D structures.

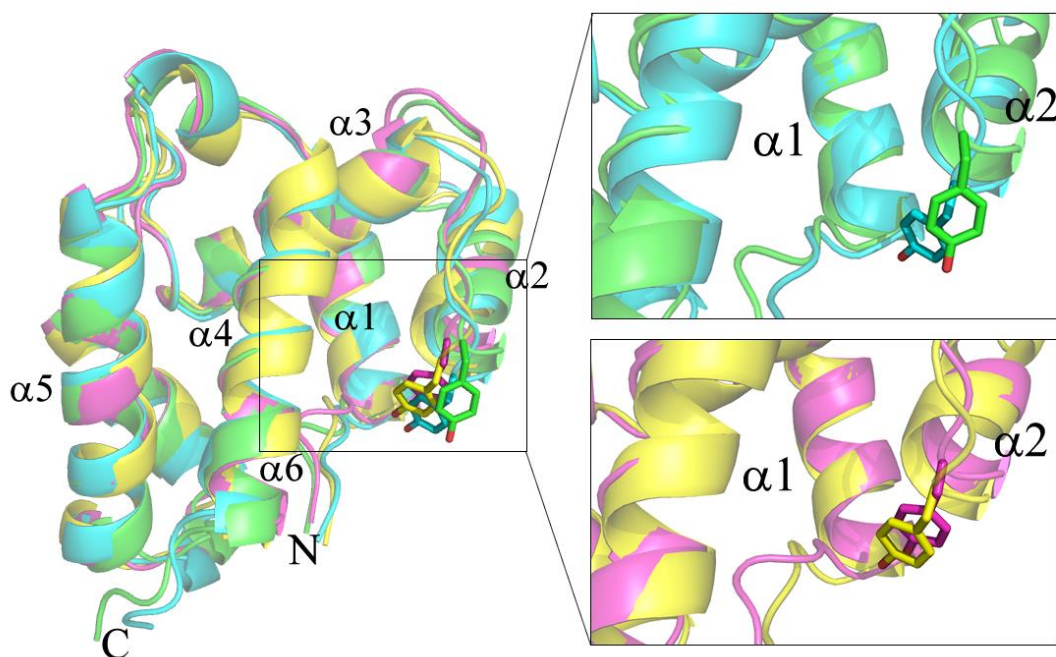

**Supplementary Figure 5.** Binding of recombinant MvicOBP3s (left) and NribOBP3 (right) to NPN (top panel) and the alarm pheromone components (bottom panel). A 2  $\mu\text{M}$  solution of the protein in 20 mM Tris pH7.4 was titrated with 1 mM solution of NPN or each of pheromone components in methanol to final concentrations of 0.1-20  $\mu\text{M}$ .

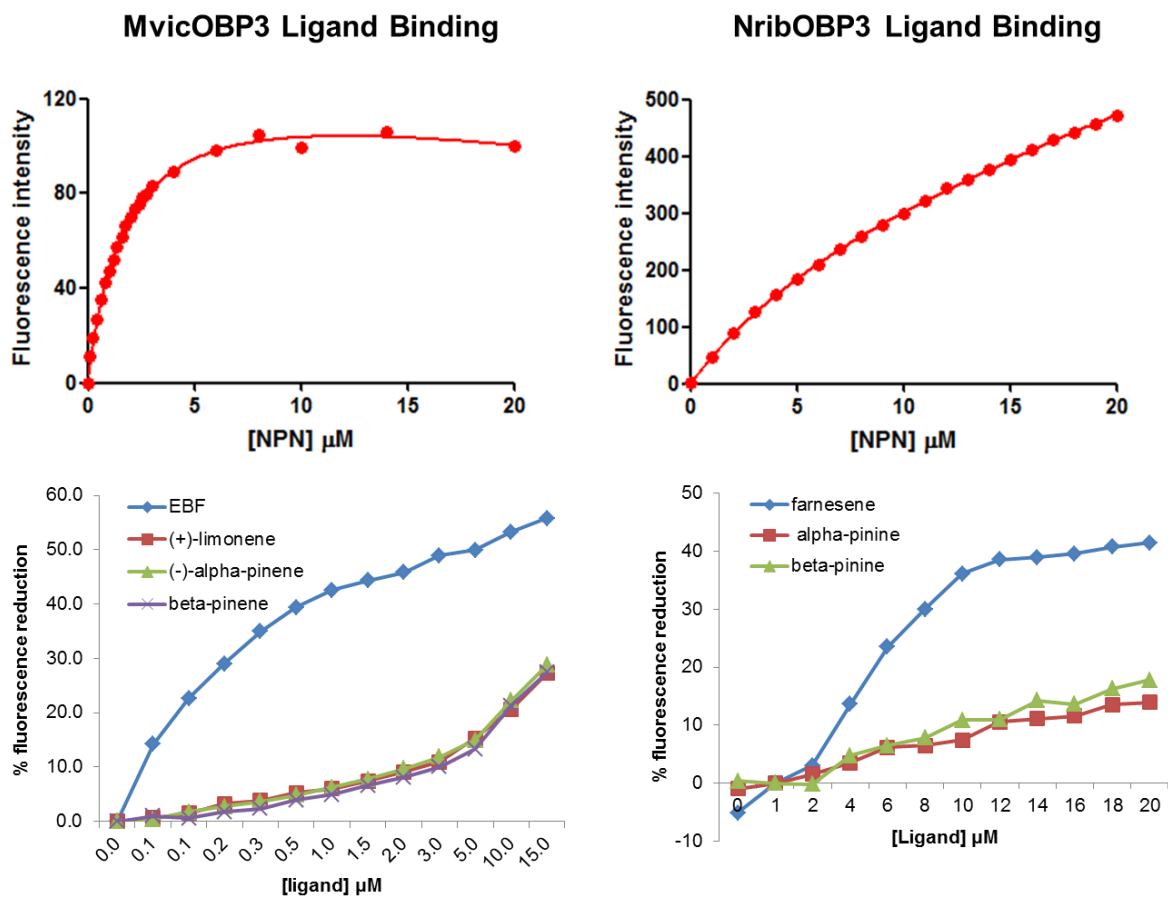

Supplement: srep24739-s1.pdf [file srep24739-s1.pdf]
